# Supplementary material for: Nanoscale tomography reveals the deactivation of automotive copper-exchanged zeolite catalysts
Source: PubMed Central journal article supplement (PMC5698465; doi:10.1038/s41467-017-01765-0), 2017-11-21
Supplement: 41467_2017_1765_MOESM3_ESM.pdf [file 41467_2017_1765_MOESM3_ESM.pdf]

## List of movies

**Supplementary Movie 1.** Fresh Cu-ZSM-5, sample 1, 1.8% Cu isoconcentration surface shown with all Al (blue) and Cu (red) ions.

**Supplementary Movie 2.** Fresh Cu-ZSM-5, sample 2, 2.7% Cu isoconcentration surface shown with all Al (blue) and Cu (red) ions.

**Supplementary Movie 3.** Aged Cu-ZSM-5, sample 3, 5% Cu and 8% Al isoconcentration surfaces shown with all Al (blue) and Cu (red) ions.

**Supplementary Movie 4.** Fresh Cu-SSZ-13, Sample 4, all Cu ions.

**Supplementary Movie 5.** Fresh Cu-SSZ-13, Sample 4, all Cu clusters.

**Supplementary Movie 6.** Fresh Cu-SSZ-13, Sample 5, all Cu and Al ions.

**Supplementary Movie 7.** Fresh Cu-SSZ-13, Sample 5, all Cu clusters.

**Supplementary Movie 8.** Aged Cu-SSZ-13, sample 6, 1.4% Cu isoconcentration surface, shown with all Al ions (blue) and Cu ions (red).

**Supplementary Movie 9.** Aged Cu-SSZ-13, sample 6, Cu clusters.

**Supplementary Movie 10.** Aged Cu-SSZ-13, sample 7 1.3% Cu isoconcentration surface and 4% Al isoconcentration surface, shown with all Al ions (blue) and Cu ions (red).
